# Supplementary material for: −254C>G SNP in theTRPC6Gene Promoter Influences Its Expression via Interaction with the NF-κB Subunit RELA in Steroid-Resistant Nephrotic Syndrome Children
Source: Hindawi journal article supplement (doi:10.1155/2019/2197837), 2019-06-10

Supplement Fig. 1.

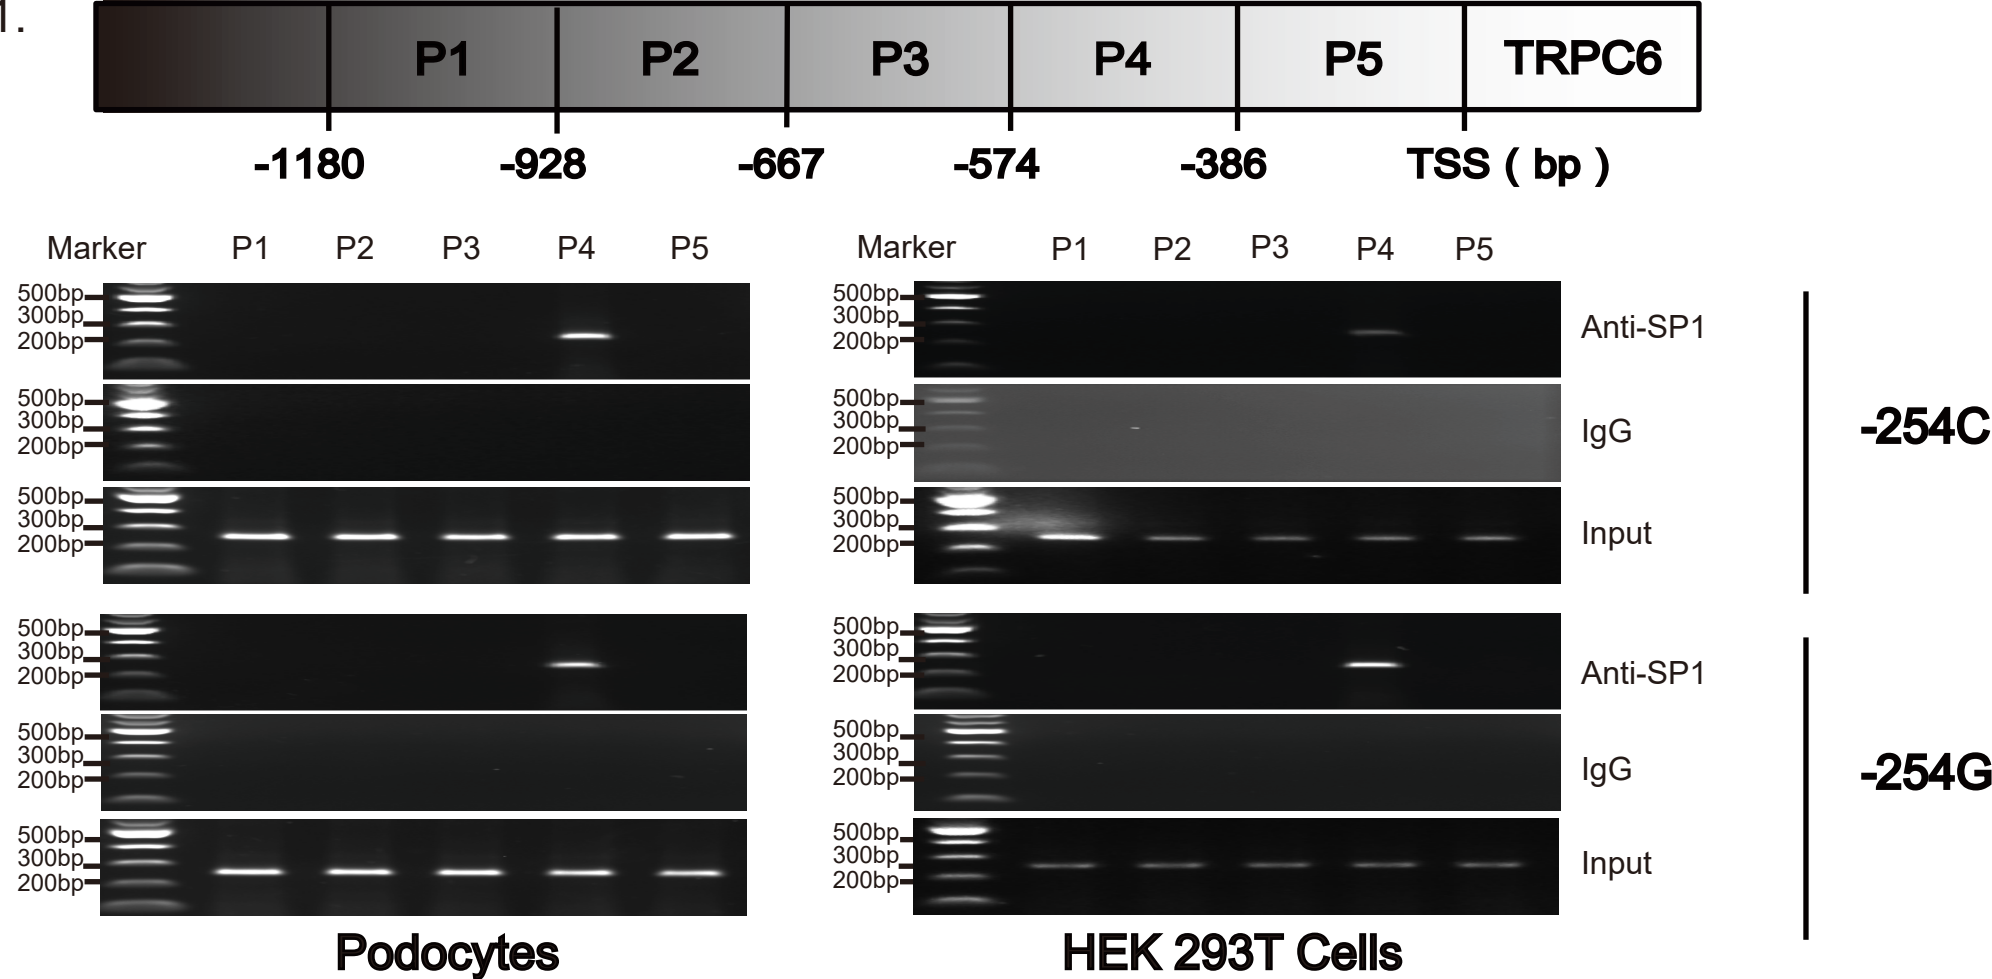

Supplement: f1 [file 2197837.f1.pdf]
